# Supplementary material
Source: MDPI journal article supplement (https://www.mdpi.com/2071-1050/16/5/2176)
Supplement: s1 [file s1]

## supplementary material

**Table S1.** Data description and sources used.

| Data                 | Description and resolution                  | Source                                                                                                   | Time      | Used in                   |
|----------------------|---------------------------------------------|----------------------------------------------------------------------------------------------------------|-----------|---------------------------|
| Climate data         | Temperature                                 |                                                                                                          |           | PLUS                      |
|                      | Precipitation                               | <a href="https://www.resdc.cn/">https://www.resdc.cn/</a>                                                | 1960-2020 | PLUS/InVEST (Water Yield) |
|                      | Potential Evapotranspiration                | <a href="https://data.tpdac.ac.cn/">https://data.tpdac.ac.cn/</a>                                        | 1901-2022 | InVEST (Water Yield)      |
| Soil data            | Plant Available Water Capacity (PAWC)       | <a href="https://www.fao.org/">https://www.fao.org/</a>                                                  | 2023      | InVEST (Water Yield)      |
| Land use data        | The maximum rooting depth of the soil (DTB) | <a href="http://globalchange.bnu.edu.cn/research/cdtb.jsp">globalchange.bnu.edu.cn/research/cdtb.jsp</a> |           |                           |
|                      | Land use/land cover change (LUCC)           | <a href="https://doi.org/10.5194/essd-2021-7">https://doi.org/10.5194/essd-2021-7</a>                    | 1985-2020 | PLUS/InVEST               |
| Elevation data       | digital elevation model (DEM)               | <a href="https://www.gscloud.cn/">https://www.gscloud.cn/</a>                                            | 2020      |                           |
| Social Economic Data | Population density                          |                                                                                                          |           |                           |
|                      | Gross Domestic Product (GDP)                | <a href="https://www.resdc.cn/">https://www.resdc.cn/</a>                                                | 1990-2020 |                           |
|                      | Water system                                |                                                                                                          |           | PLUS                      |
|                      |                                             | <a href="https://www.webmap.cn/">(https://www.webmap.cn/</a>                                             | 2019      |                           |
|                      | Road vector data                            |                                                                                                          |           |                           |

**Table S2.** Biophysical table of water yield

| Description       | lucode | root_depth | Kc   | LULC_veg |
|-------------------|--------|------------|------|----------|
| cropland          | 1      | 1000       | 1.1  | 1        |
| forest            | 2      | 5200       | 0.95 | 1        |
| grassland         | 3      | 2300       | 0.85 | 1        |
| water             | 4      | 100        | 1    | 0        |
| unused            | 5      | 300        | 0.2  | 1        |
| construction land | 6      | 100        | 0.2  | 0        |

lucode is the land use type code; root\_depth is the plant root depth (mm); Kc is coefficient of vaporization; LULC\_veg is an attribute category that determines 0 and 1 based on whether there is vegetative cover, with 1 being vegetative cover and 0 being no vegetative cover.

**Table S3.** Biophysical table of sediment delivery

| Description       | lucode | usle_c | usle_p |
|-------------------|--------|--------|--------|
| cropland          | 1      | 0.2    | 0.35   |
| forest            | 2      | 0.05   | 1      |
| grassland         | 3      | 0.3    | 1      |
| water             | 4      | 0      | 0      |
| unused            | 5      | 1      | 0      |
| construction land | 6      | 0      | 0.01   |

lucode is the land use type code; usle\_c is the vegetation cover management factor; usle\_p is the soil and water conservation measure factor.

**Table S4.** Table of threat factors data

| THREAT | MAX_DIST | WEIGHT | DECAY       |
|--------|----------|--------|-------------|
| crp    | 7        | 0.7    | linear      |
| urb    | 10       | 1      | exponential |
| unused | 3        | 0.3    | linear      |
| road   | 4        | 0.5    | linear      |

THREAT is the threat factor; MAX\_DIST is the maximum threat distance (km); WEIGHT is the effect of each threat on habitat integrity as a relative value to other threats, with weights ranging from 0 to 1; DECAY indicate the type of degradation caused by the threat.

**Table S5.** Table of habitat sensitivity parameters

| lucode | LULC_Name | HABITAT | crp | urb | unused | road |
|--------|-----------|---------|-----|-----|--------|------|
| 1      | cropland  | 0.5     | 0.2 | 0.9 | 0.5    | 0.3  |
| 2      | forest    | 1       | 0.5 | 0.8 | 0.2    | 0.6  |
| 3      | grassland | 0.9     | 0.2 | 0.5 | 0.3    | 0.6  |
| 4      | water     | 1       | 0.4 | 0.6 | 0.5    | 0.5  |
| 5      | unused    | 0.1     | 0.1 | 0.3 | 0.2    | 0.4  |
| 6      | urban     | 0       | 0   | 0   | 0      | 0    |

lucode is the land use type code; HABITAT indicates the degree of habitat suitability for each class, ranging from 0 to 1, with higher values indicating better habitat suitability and the opposite being worse; crp, urb, unused, and road are the relative sensitivities of different land use types to each threat type, where 1 indicates high sensitivity and 0 indicates no impact.

**Table S6.** Above ground, below ground, soil, dead organic matter carbon stocks

| lucode | LULC_Name            | C_above | C_below | C_soil | C_dead |
|--------|----------------------|---------|---------|--------|--------|
| 1      | cropland             | 2.9     | 3.44    | 76.6   | 1.24   |
| 2      | forest               | 30.89   | 9.12    | 107.82 | 2.48   |
| 3      | grassland            | 0.49    | 4.29    | 75.54  | 0.22   |
| 4      | water                | 0.64    | 0.45    | 0      | 0      |
| 5      | unused               | 0.45    | 0.87    | 38.55  | 0      |
| 6      | construction<br>land | 2.26    | 1.45    | 0      | 0      |

lucode is the land use type code; C\_above, C\_below, C\_soil, and C\_dead are carbon densities of aboveground, belowground, soil organic matter, and dead organic matter, respectively.
